# Supplementary material
Source: PubMed Central journal article supplement (PMC5847656)
Supplement: JB.00738-17_zjb999094676s7.pdf [file JB.00738-17_zjb999094676s7.pdf]

|                                              |                                             |
|----------------------------------------------|---------------------------------------------|
| <b>Cluster 1 Strains</b>                     | <b>Cluster 4 Strains</b>                    |
| <i>Actinobaculum urinale</i> str. UMB0759    | <i>Lactobacillus crispatus</i> str. UMB0044 |
| <i>Actinomyces europaeus</i> str. UMB0652    | <i>L. crispatus</i> str. UMB0054            |
| <i>Actinomyces hominis</i> str. UMB0859      | <i>L. crispatus</i> str. UMB0085            |
| <i>Actinomyces neuui</i> str. UMB0125        | <i>L. crispatus</i> str. UMB0803            |
| <i>A. neuui</i> str. UMB0138                 | <i>L. crispatus</i> str. UMB0824            |
| <i>A. neuui</i> str. UMB0402                 | <i>L. crispatus</i> str. UMB1398            |
| <i>Actinomyces turicensis</i> str. UMB0250   | <b>Cluster 5 Strains</b>                    |
| <i>Corynebacterium coyleae</i> str. UMB0989  | <i>Lactobacillus gasseri</i> str. UMB0045   |
| <i>Corynebacterium</i> sp. str. UMB0763      | <i>L. gasseri</i> str. UMB0670              |
| <i>Varibaculum cambriense</i> str. UMB0796   | <i>L. pontis</i> str. UMB0683               |
| <i>V. cambriense</i> str. UMB0796            | <i>L. vaginalis</i> str. UMB0388            |
| <i>Dermabacter hominis</i> str. UMB0490      | <b>Cluster 6 Strains</b>                    |
| <b>Cluster 2 Strains</b>                     | <i>Escherichia coli</i> str. UMB0727        |
| <i>Gardnerella vaginalis</i> str. UMB0032A   | <i>E. coli</i> str. UMB0789                 |
| <i>G. vaginalis</i> str. UMB0032B            | <i>E. coli</i> str. UMB0900                 |
| <i>G. vaginalis</i> str. UMB0061             | <i>E. coli</i> str. UMB0901                 |
| <i>G. vaginalis</i> str. UMB0170             | <b>Cluster 7 Strains</b>                    |
| <i>G. vaginalis</i> str. UMB0264             | <i>Bifidobacterium breve</i> str. UMB0089   |
| <i>G. vaginalis</i> str. UMB0411             | <i>B. breve</i> str. UMB0915                |
| <i>G. vaginalis</i> str. UMB0682             | <i>B. longum</i> str. UMB0788               |
| <i>G. vaginalis</i> str. UMB0775             |                                             |
| <i>G. vaginalis</i> str. UMB0830             |                                             |
| <i>G. vaginalis</i> str. UMB0833             |                                             |
| <i>G. vaginalis</i> str. UMB1428             |                                             |
| <i>G. vaginalis</i> str. UMB1642             |                                             |
| <b>Cluster 3 Strains</b>                     |                                             |
| <i>Aerococcus urinae</i> str. UMB0072        |                                             |
| <i>A. urinae</i> str. UMB0080                |                                             |
| <i>A. urinae</i> str. UMB0088                |                                             |
| <i>A. urinae</i> str. UMB0126                |                                             |
| <i>A. urinae</i> str. UMB0232                |                                             |
| <i>Streptococcus agalactiae</i> str. UMB0049 |                                             |
| <i>S. agalactiae</i> str. UMB0776            |                                             |
| <i>S. anginosus</i> str. UMB0050             |                                             |
| <i>S. anginosus</i> str. UMB0839             |                                             |
| <i>Streptococcus</i> sp. str. UMB0767        |                                             |
| <i>S. dentisani</i> str. UMB0079             |                                             |
| <i>S. dentisani</i> str. UMB0832             |                                             |
| <i>S. mitis</i> str. UMB0079                 |                                             |
| <i>S. mitis</i> str. UMB1341                 |                                             |

**Table S1.** Clusters of bladder isolates containing phage sequences with sequence similarity.

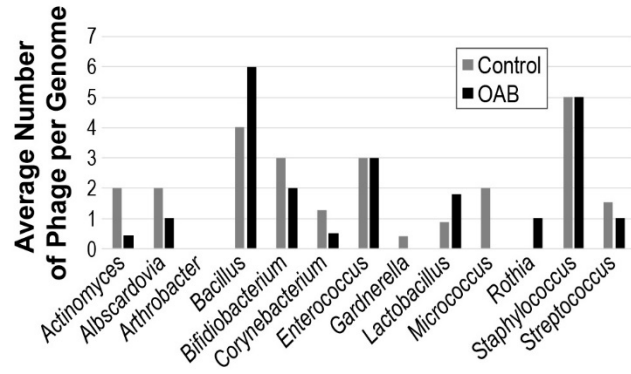

**Fig. S1. Average number of lower confidence phage sequences per genome isolated from Control and OAB patients.** Genera with representatives from both patient populations are shown.
